# Supplementary material
Source: PubMed Central journal article supplement (PMC7680281)
Supplement: NIHMS1615918-supplement-1.pdf [file NIHMS1615918-supplement-1.pdf]

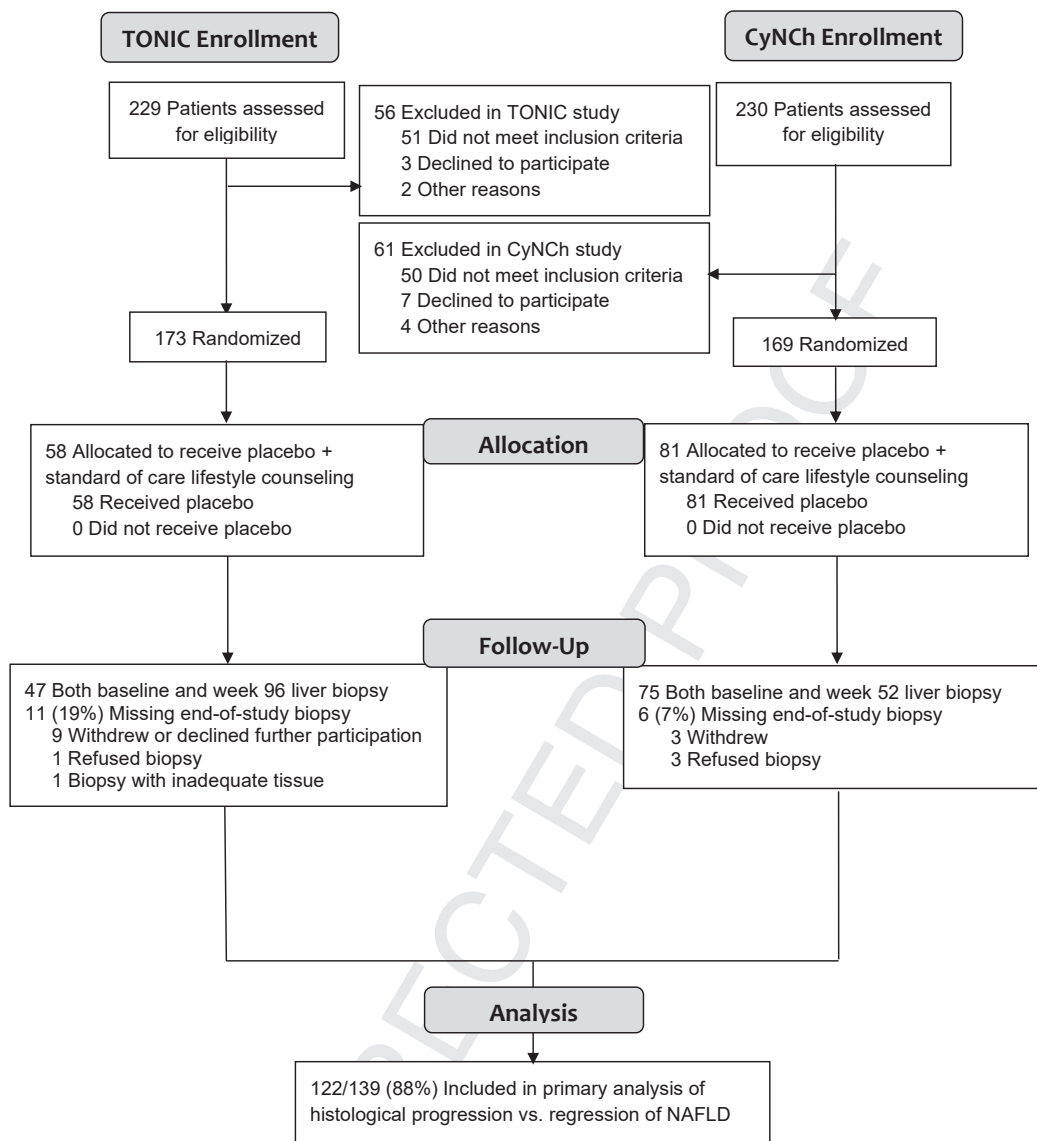

**Supplementary Figure 1.** CONSORT flow diagram depicting the allocation of participants to placebo arms in the TONIC and CyNCh clinical trials and the combined number with end-of-treatment biopsies available for analysis.

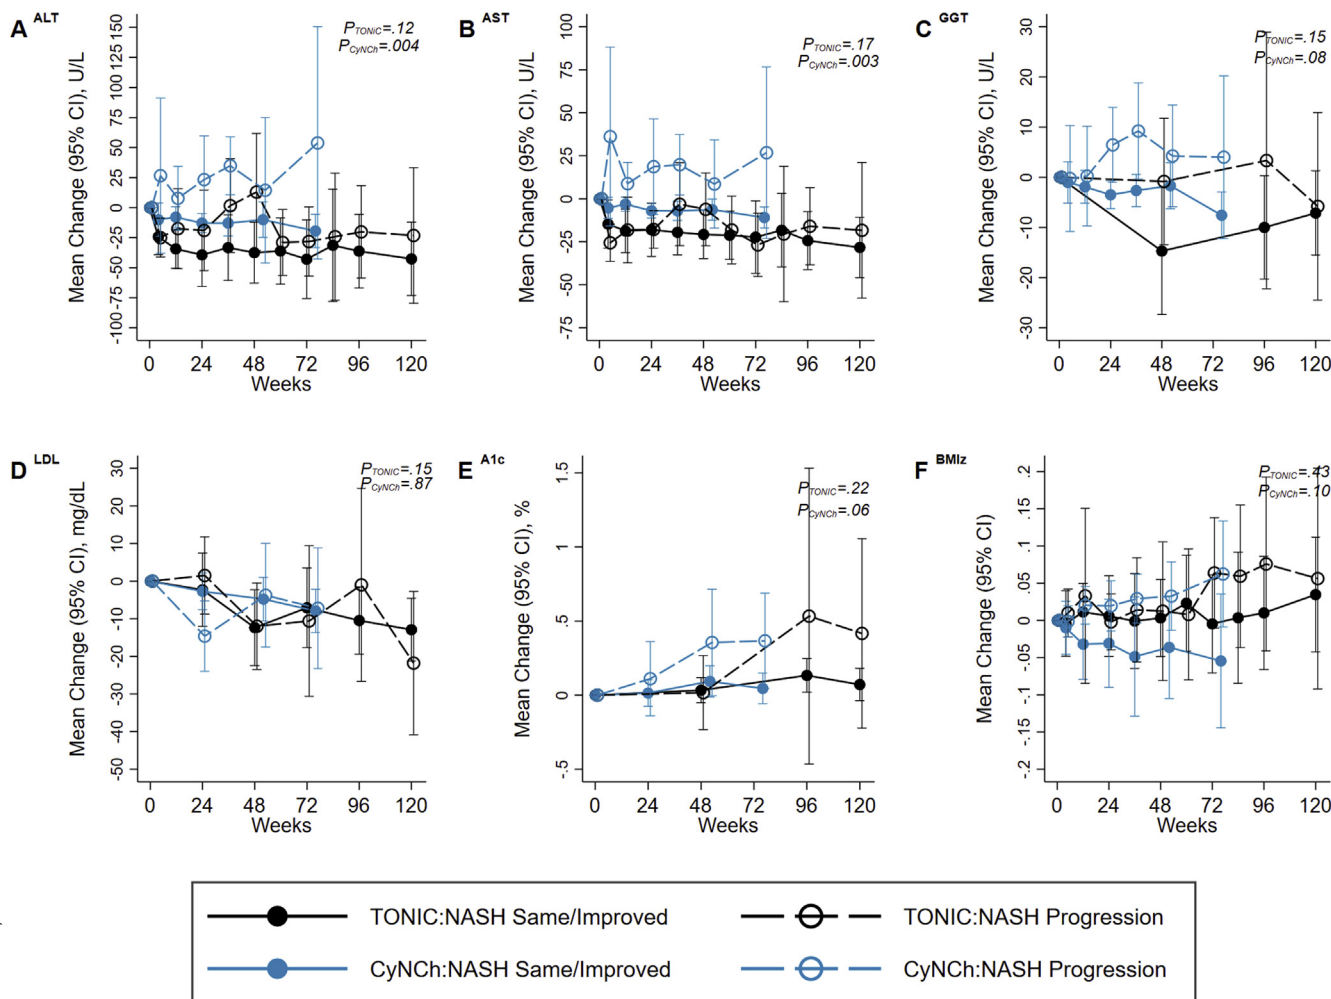

**Supplementary Figure 2.** Mean change from baseline in characteristics associated with progression vs. same/improved NASH by trial. Panels include (on y-axis): (A) ALT (U/L), (B) AST (U/L), (C) GGT (U/L), (D) LDL cholesterol (mg/dL), (E) hemoglobin A<sub>1c</sub> (A1c) (%), and (F) BMI z-score (BMIz). The x-axis indicates weeks of observation. Same/improved NASH is denoted by black (TONIC) or blue (CyNCh) solid lines, while progression in NASH is indicated by black-dashed (TONIC) or blue-dashed (CyNCh) lines. Generalized estimating equation estimators were used to account for repeated visits for multiple regression models of the change in laboratory test or BMI z-score in relation to the histological outcome indicator as described in the Figure 2 legend. Each trial was analyzed separately. The longitudinal probability (2-sided) was determined by testing the histological effect and the interaction term.

web 4C/FPO

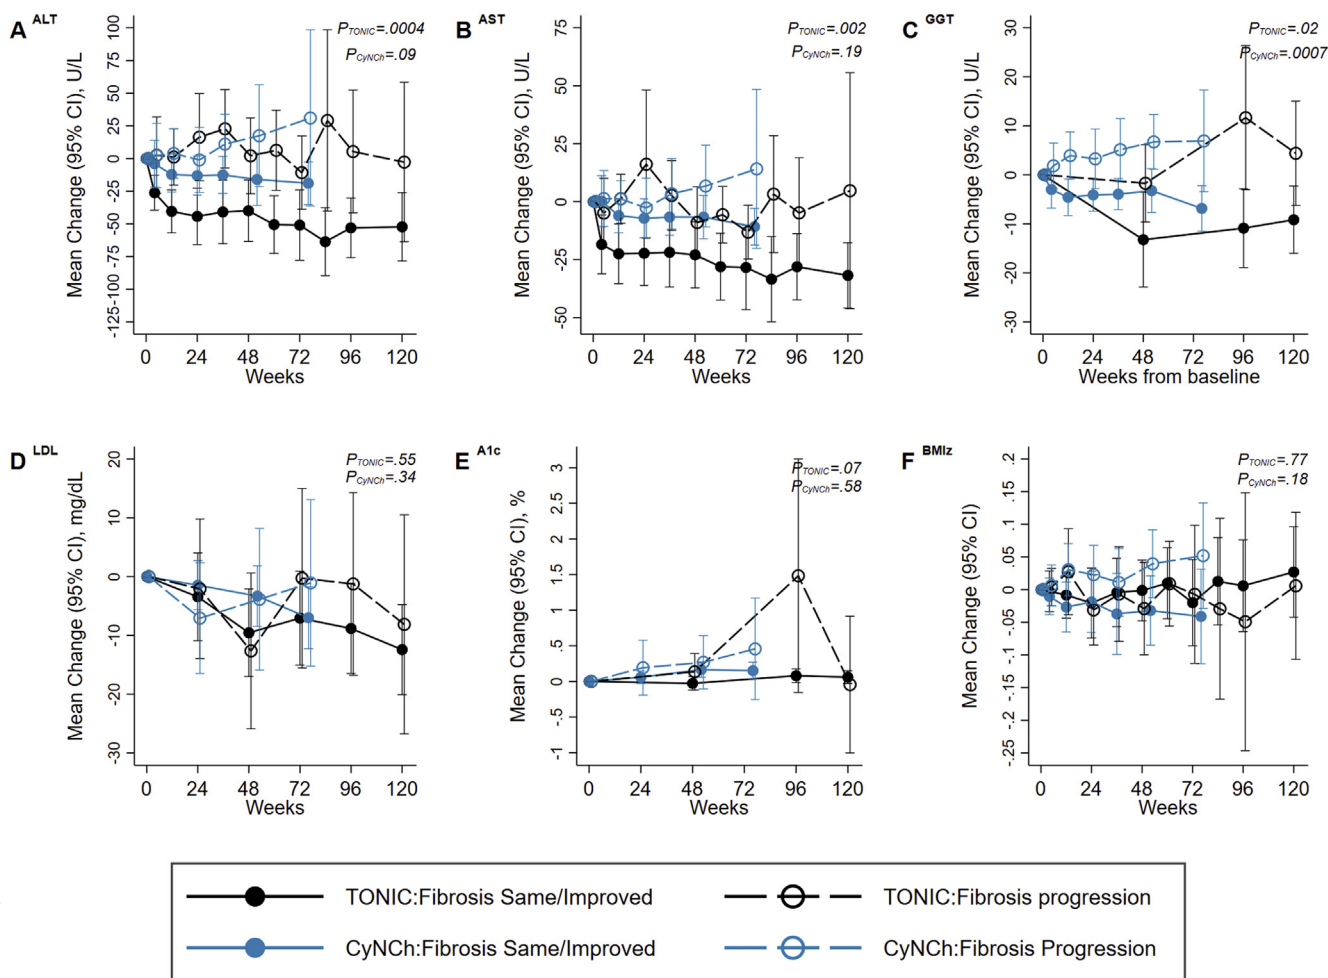

**Supplementary Figure 3.** Mean change from baseline in characteristics associated with progression of vs same/improved fibrosis by trial. Panels include (on y-axis): (A) ALT (U/L), (B) AST (U/L), (C) GGT (U/L), (D) LDL cholesterol (mg/dL), (E) hemoglobin A<sub>1c</sub> (A<sub>1c</sub>) (%), and (F) BMI z-score (BMIz). The x-axis indicates weeks of observation. Fibrosis improvement is denoted by black (TONIC) or blue (CyNCh) solid lines, while fibrosis progression is indicated by black-dashed (TONIC) or blue-dashed (CyNCh) lines. Generalized estimating equation estimators were used to account for repeated visits for multiple regression models of the change in lab test or BMI z-score in relation to the histological outcome indicator as described in Figure 3 legend. Each trial was analyzed separately. The longitudinal probability (2-sided) was determined by testing the histological effect and the interaction term.

web 4C/FPO

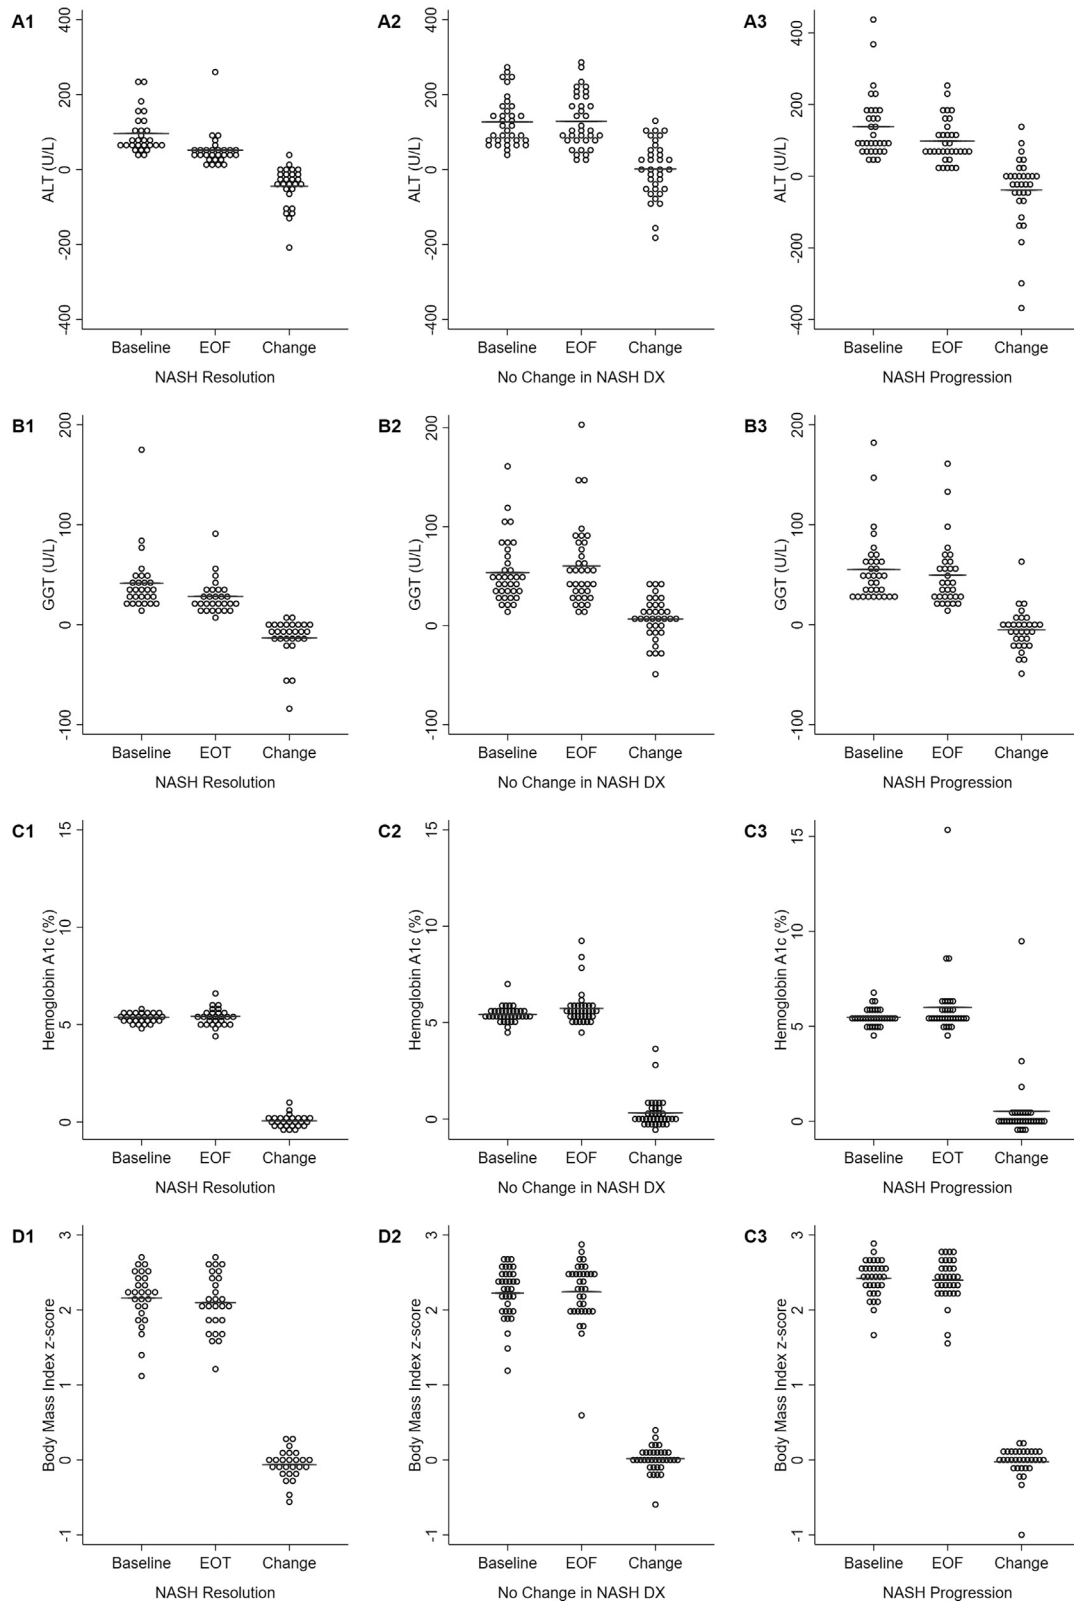

**Supplementary Figure 4.** Individual patient data are displayed (dots) for change in (A) ALT (U/L), (B) GGT (mg/dL), (C) hemoglobin A1c (A1<sub>C</sub>), and (D) BMI z-score (BMI<sub>z</sub>) at baseline, end-of-follow-up (EOF), and change from baseline for resolution of NASH (A1, B1, C1, D1; N = 28 [29%]) compared with those with no change in NASH diagnosis (A2, B2, C2, D2; N = 35 [36%]) or with progression to NASH (A3, B3, C3, D3; N = 33 [34%]). The black horizontal line depicts mean value at each time point.

**Supplementary Table 1.** Histologic outcomes and changes from baseline for clinical characteristics by Study Group in children with NAFLD followed over 52 or 96 weeks

| Histologic outcomes and change from baseline for clinical characteristics | TONIC (96 wk)      | CyNCh (52 weeks)  | OR (95% CI) or        | P <sup>a</sup> |
|---------------------------------------------------------------------------|--------------------|-------------------|-----------------------|----------------|
|                                                                           | n (%) or mean (SD) | n (%) or mean(SD) | Adjusted mean changes |                |
| <i>Histologic Outcomes:</i>                                               |                    |                   |                       |                |
| Resolution of NASH (n = 96)                                               | 11 (28)            | 17 (30)           | 1.08 (0.44 to 2.66)   | .87            |
| Progression to definite NASH (n = 84)                                     | 6 (20)             | 9 (17)            | 0.8 (0.25 to 2.52)    | .70            |
| Combined improvement in:                                                  |                    |                   |                       |                |
| Fibrosis <u>or</u> NASH resolution (n = 99)                               | 23 (56)            | 28 (48)           | 0.73 (0.33 to 1.63)   | .44            |
| Fibrosis <u>and</u> NASH resolution (n = 96)                              | 7 (18)             | 12 (21)           | 1.22 (0.43 to 3.44)   | .71            |
| Combined progression in:                                                  |                    |                   |                       |                |
| Fibrosis <u>or</u> to definite NASH (n = 95)                              | 14 (40)            | 20 (33)           | 0.66 (−0.16 to 2.68)  | .57            |
| Fibrosis <u>and</u> to definite NASH (n = 84)                             | 4 (13)             | 5 (9)             | 0.66 (0.16 to 2.68)   | .57            |
| Fibrosis                                                                  |                    |                   |                       |                |
| Patients with improvement                                                 | 19 (40)            | 23 (31)           | 0.65 (0.30 to 1.40)   | .27            |
| Patients with worse fibrosis                                              | 12 (26)            | 16 (21)           | 0.70 (0.34 to 1.86)   | .59            |
| Change in score                                                           | −0.1 (1.3)         | −0.1 (1.0)        | −0.07 (−0.44 to 0.29) | .70            |
| Total NAFLD activity score (NAS)                                          |                    |                   |                       |                |
| Patients with improvement                                                 | 26 (55)            | 40 (53)           | 0.92 (0.44 to 1.92)   | .83            |
| Patients with worse NAS                                                   | 14 (30)            | 16 (21)           | 0.64 (0.28 to 1.47)   | .29            |
| Change in score                                                           | −0.7 (2.0)         | −0.8 (1.8)        | 0.04 (−0.58 to 0.66)  | .90            |
| Hepatocellular ballooning                                                 |                    |                   |                       |                |
| Patients with improvement                                                 | 10 (21)            | 21 (28)           | 1.44 (0.61 to 3.41)   | .41            |
| Patients with worse ballooning                                            | 12 (26)            | 7 (9)             | 0.30 (0.11 to 0.83)   | <b>.02</b>     |
| Change in score                                                           | 0.1 (0.8)          | −0.3 (0.8)        | −0.39 (0.65 to −0.14) | <b>.002</b>    |
| Steatosis                                                                 |                    |                   |                       |                |
| Patients with improvement                                                 | 19 (40)            | 33 (44)           | 1.16 (0.55 to 2.43)   | .70            |
| Patients with worse steatosis                                             | 9 (19)             | 10 (13)           | 0.65 (0.23 to 1.74)   | .39            |
| Change in score                                                           | −0.4 (1.2)         | −0.4 (0.9)        | 0.23 (−0.12 to 0.58)  | .20            |
| Lobular inflammation                                                      |                    |                   |                       |                |
| Patients with improvement                                                 | 20 (43)            | 17 (23)           | 0.40 (0.18 to 0.87)   | <b>.02</b>     |
| Patients with worse lobular inflammation                                  | 7 (15)             | 14 (19)           | 1.31 (0.49 to 3.53)   | .59            |
| Change in score                                                           | −0.3 (0.8)         | −0.1 (0.8)        | 0.20 (−0.05 to 0.45)  | .12            |
| Portal inflammation                                                       |                    |                   |                       |                |
| Patients with improvement                                                 | 7 (15)             | 14 (19)           | 1.31 (0.49 to 3.53)   | .59            |
| Patients with worse portal inflammation                                   | 10 (21)            | 11 (15)           | 0.64 (0.25 to 1.64)   | .35            |
| Change in score                                                           | 0.06 (0.60)        | −0.1 (0.6)        | −0.09 (−0.29 to 0.12) | .40            |

3661 3662 3663 3664 3665 3666 3667 3668 3669 3670 3671 3672 3673 3674 3675 3676 3677 3678 3679 3680 3681 3682 3683 3684 3685 3686 3687 3688 3689 3690 3691 3692 3693 3694 3695 3696 3697 3698 3699 3700 3701 3702 3703 3704 3705 3706 3707 3708 3709 3710 3711 3712 3713 3714 3715 3716 3717 3718 3719 3720

Supplementary Table 1. Continued

| Histologic outcomes and change from baseline for clinical characteristics   | TONIC (96 wk)      | CyNCh (52 weeks)  | OR (95% CI) or        | <i>P</i> <sup>a</sup> |
|-----------------------------------------------------------------------------|--------------------|-------------------|-----------------------|-----------------------|
|                                                                             | (n = 47)           | (n = 75)          | Adjusted mean changes |                       |
|                                                                             | n (%) or mean (SD) | n (%) or mean(SD) |                       |                       |
| <b>Change from baseline at 52 or 96 weeks for clinical characteristics:</b> |                    |                   |                       |                       |
| Change in age (y)                                                           | 1.4 (0.3)          | 0.5 (0.3)         | -0.9 (-1.0 to -0.8)   | <.001                 |
| Diabetes type 2 incident cases:                                             |                    |                   |                       |                       |
| Incident cases over 72 or 120 wk <sup>b</sup>                               | 4 (9)              | 2 (3)             | 0.29 (0.05 to 1.68)   | .17                   |
| Body Mass Index (BMI, kg/m <sup>2</sup> )                                   | 1.8 (2.9)          | 1.0 (2.2)         | -0.92 (-1.91 to 0.06) | .07                   |
| BMI z-score: >0 (BMI higher) vs                                             |                    |                   |                       |                       |
| ≤ 0 (same or lower)                                                         | 26 (57)            | 40 (54)           | 0.90 (0.43 to 1.90)   | .79                   |
| Mean change                                                                 | -0.01 (0.2)        | -0.02 (0.2)       | -0.01 (-0.10 to 0.07) | .87                   |
| Laboratory:                                                                 |                    |                   |                       |                       |
| Change in ALT (U/L)                                                         | -38 (74)           | -9 (78)           | 11.7 (-12.4 to 35.8)  | .34                   |
| Change in AST (U/L)                                                         | -22.1 (42.8)       | -3.8 (35.9)       | 6.8 (-5.7 to 19.3)    | .28                   |
| Change in GGT (U/L)                                                         | -5.0 (25.7)        | 0.01 (16.5)       | 2.1 (-5.4 to 9.6)     | .58                   |
| Change in fasting glucose (mg/dL)                                           | 4.3 (24.9)         | 4.6 (27.3)        | -0.3 (-10.2 to 9.6)   | .95                   |
| Change in HbA1c (%)                                                         | 0.4 (1.5)          | 0.2 (0.5)         | -0.3 (-0.7 to 0.1)    | .12                   |

OR or adjusted mean changes, 95% confidence limits and *P* (2-sided) are determined from multiple linear regression of the change in continuous measure on study indicator and adjustment for the baseline value of the outcome. For binary measures, logistic regression of the outcome on study indicator was used.

<sup>a</sup>For each study, either unadjusted mean changes (standard deviations) or n (%) are reported.

3721  
3722  
3723  
3724  
3725  
3726  
3727  
3728  
3729  
3730  
3731  
3732  
3733  
3734  
3735  
3736  
3737  
3738  
3739  
3740  
3741  
3742  
3743  
3744  
3745  
3746  
3747  
3748  
3749  
3750  
3751  
3752  
3753  
3754  
3755  
3756  
3757  
3758  
3759  
3760  
3761  
3762  
3763  
3764  
3765  
3766  
3767  
3768  
3769  
3770  
3771  
3772  
3773  
3774  
3775  
3776  
3777  
3778  
3779  
3780

3781  
3782  
3783  
3784  
3785  
3786  
3787  
3788  
3789  
3790  
3791  
3792  
3793  
3794  
3795  
3796  
3797  
3798  
3799  
3800  
3801  
3802  
3803  
3804  
3805  
3806  
3807  
3808  
3809  
3810  
3811  
3812  
3813  
3814  
3815  
3816  
3817  
3818  
3819  
3820  
3821  
3822  
3823  
3824  
3825  
3826  
3827  
3828  
3829  
3830  
3831  
3832  
3833  
3834  
3835  
3836  
3837  
3838  
3839  
3840
